# Supplementary material for: Naloxegol and Postoperative Urinary Retention: A Randomized Trial
Source: MDPI journal article supplement (doi:10.3390/jcm11020454), 2022-01-17
Supplement: s1 [file s1]

**Table S1. Summary of incidence of each opioid-related side effect item by group**

| <b>Side effect</b>       | <b>Naloxegol (N = 67)</b> | <b>Placebo (N = 64)</b> |
|--------------------------|---------------------------|-------------------------|
| Nausea                   | 27 (40)                   | 24 (39)                 |
| Vomiting                 | 7 (10)                    | 7 (11)                  |
| Constipation             | 12 (18)                   | 14 (23)                 |
| Difficulty passing urine | 17 (26)                   | 9 (15)                  |
| Difficulty concentration | 18 (27)                   | 15 (25)                 |
| Drowsiness               | 35 (53)                   | 30 (49)                 |
| Feeling dizzy            | 26 (39)                   | 15 (25)                 |
| Feeling confused         | 6 (9)                     | 6 (10)                  |
| Fatigue                  | 38 (58)                   | 29 (48)                 |
| Itchiness                | 12 (18)                   | 18 (30)                 |
| Dry mouth                | 57 (86)                   | 52 (85)                 |
| Headache                 | 18 (27)                   | 10 (16)                 |

The data was summarized as N (%). The incidence of each item was considered as positive if the patient had this symptom at any postoperative day 1 or day 2.

**Table S2. Summary of functionality**

| <b>Functionality</b> | <b>N missing</b> | <b>Naloxegol (N = 67)</b> | <b>Placebo (N = 64)</b> |
|----------------------|------------------|---------------------------|-------------------------|
| Bathing              | 4                | 32 (49)                   | 39 (63)                 |
| Toileting            | 4                | 49 (75)                   | 50 (81)                 |
| Walking              | 4                | 55 (85)                   | 54 (87)                 |
| Ileus                | 4                | 1 (2)                     | 3 (5)                   |
| Flatus               | 4                | 59 (91)                   | 60 (97)                 |
| First bowel movement | 16               | 12 (20)                   | 6 (11)                  |

Data was summarized as N (%). The incidence of each item was considered as positive if the patients had it present at any postoperative day 1 or day 2.
